# Supplementary material
Source: PubMed Central journal article supplement (PMC7116463)
Supplement: EMS106926-supplement-Supplementary_Data.pdf [file EMS106926-supplement-Supplementary_Data.pdf]

## SUPPLEMENTARY DATA

### Supplementary figure legends

#### Figure S1. Hh signaling is not perturbed in *lgl* tumors

(A) Gene Set Enrichment Analysis (GSEA) (Subramanian et al., 2005), plot displaying absence of Hh-pathway enrichment in *lgl* mosaic tumors. GSEA provides a quantitative measure for the enrichment status of a set of predefined genes between two phenotypes. A gene set is considered statistically enriched at a  $p < 0.05$ ; an FDR (false discovery rate) and a more conservative FWER of  $< 0.05$  (see, Khan et al., 2013). GSEA analysis of the transcriptome of *lgl* mosaics wing disc (<http://www.ebi.ac.uk/arrayexpress/experiments/E-MEXP-2753/>, (Khan et al., 2013) generated in a *Minute* genetic background does not reveal significant enrichment of the Hh signaling pathway. (B-C) Mosaic wing imaginal disc displaying *lgl* mutant clones (non-green) generated in a *Minute* genetic background and marked by the absence of Lgl do not display gain of Ptc distally where these do not transform (C, blue stars) or in the hinge domain where these transform (arrowhead). Neoplastic transformation was assayed by the disrupted F actin in the *lgl* clones (arrow in B). (D) *lgl* mutant clones (marked by absence  $\beta$ -galactosidase) do not show any change in the levels of Dpp target, pMAD (blue stars, D). Abbreviation: A= Anterior, P=Posterior, in all figures. Scale bars 100  $\mu$ m.

#### Figure S2. Ectopic gain of En in the anterior wing forms *de novo* A/P boundaries and activates Hh signaling.

(A) Hh ligand-secreting, *UAS-en* clones in the anterior [A] wing compartment exhibit cell autonomous loss of Ci and non-cell autonomous gain of Ci around the clones (arrowheads, see (Dominguez et al., 1996)). (B) *UAS-en* clones in the anterior compartment with gain of Hh target Ptc outside the clone boundary (arrowhead, also see, Zecca et al., 1995). (C) The Dpp target pMAD (C, arrowhead, see Tanimoto et al., 2000) is activated both within and outside the clone boundary (dotted outline). Boxed areas in the middle panels are shown at a higher magnification on the right. Scale bars 100  $\mu$ m.

#### Figure S3. Hh-sending *lgl* mutant clones undergo neoplastic transformation in the anterior compartment.

(A) Anterior [A] and posterior [P] compartments of the leg and haltere imaginal discs displaying expression of En and Ci. (B) Hh target, Ptc (G), is seen in the anterior cells abutting the A/P boundary.

32 (C-D) Hh ligand-sending *lgl* clones (*lgl UAS-en*) undergo neoplastic transformations (arrow) selectively in  
33 the anterior compartments of haltere (G) and leg (H) imaginal discs, and induce the Hh target, Ptc  
34 (arrow), in cell abutting the clone boundary. Scale bars 100  $\mu\text{m}$ .

35

36 **Figure S4. Hh-sending *lgl* mutant clones display hyperplasia in surrounding tissue**

37 *lgl UAS-en* clone (GFP) anterior to the MF (boxed area) display hyperplasia in surrounding tissue  
38 (arrowhead), as seen by characteristic folds of the surrounding epithelium (grey, F-actin). Boxed region  
39 has been magnified in the far right. Scale bars 100  $\mu\text{m}$ .

40 **Figure S5. Hh-receiving *lgl* mutant clones transform in the posterior compartment.**

41 (A-C) Hh ligand-receiving clones, *UAS-ci*, activate Hh targets in only the posterior (P) wing  
42 compartment. (A) *UAS-ci* clones do not exhibit loss of En (arrow). (B) *UAS-ci* clones in the posterior  
43 wing compartment display cell autonomous gain of Hh target, Ptc (arrow), and (C) a Dpp target, pMAD  
44 (arrow). (D-E) Hh ligand-receiving *lgl* clones (*lgl UAS-ci*) undergo neoplastic transformation (arrow)  
45 selectively in the posterior compartments of haltere (D) and leg (E) imaginal discs, and display cell  
46 autonomous gain of Hh target, Ptc (D, E). Scale bars 100  $\mu\text{m}$ .

FIGURE S1

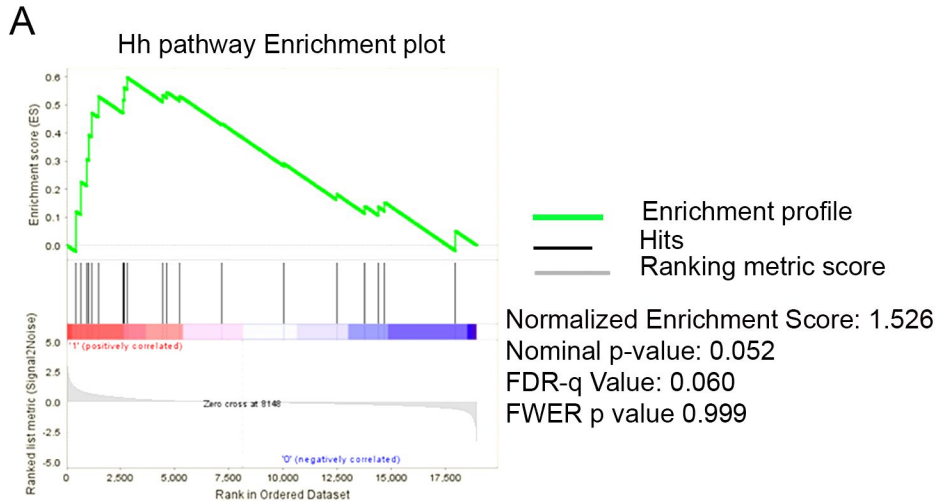

*lgl* mosaic

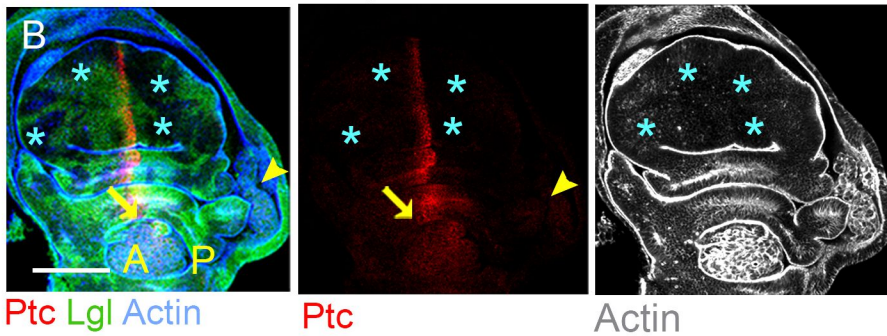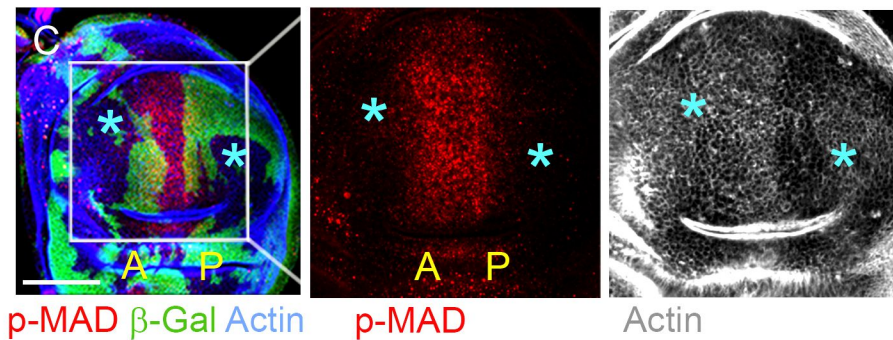

FIGURE S2

Hh-sending *UAS-en* clones

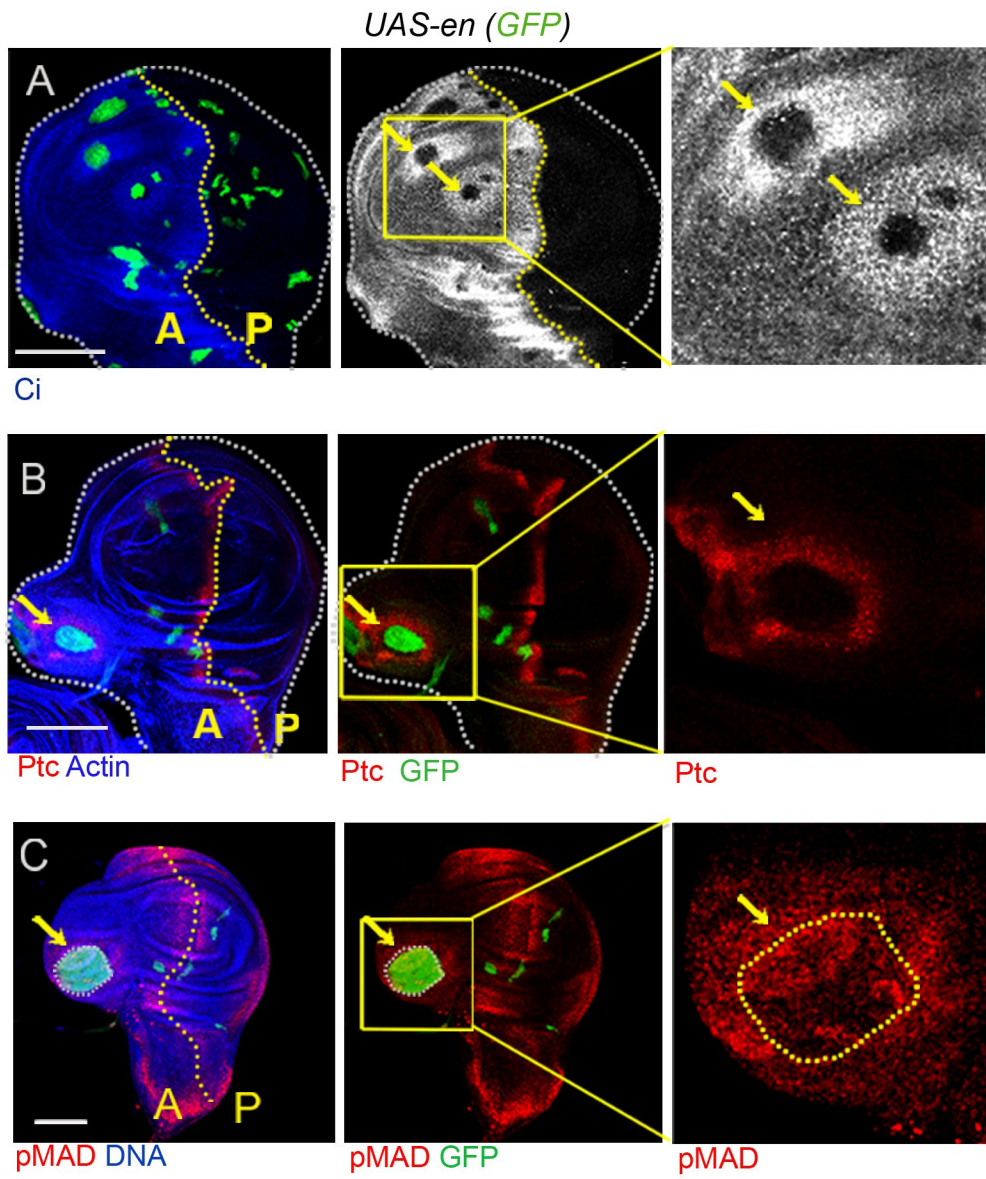

FIGURE S3

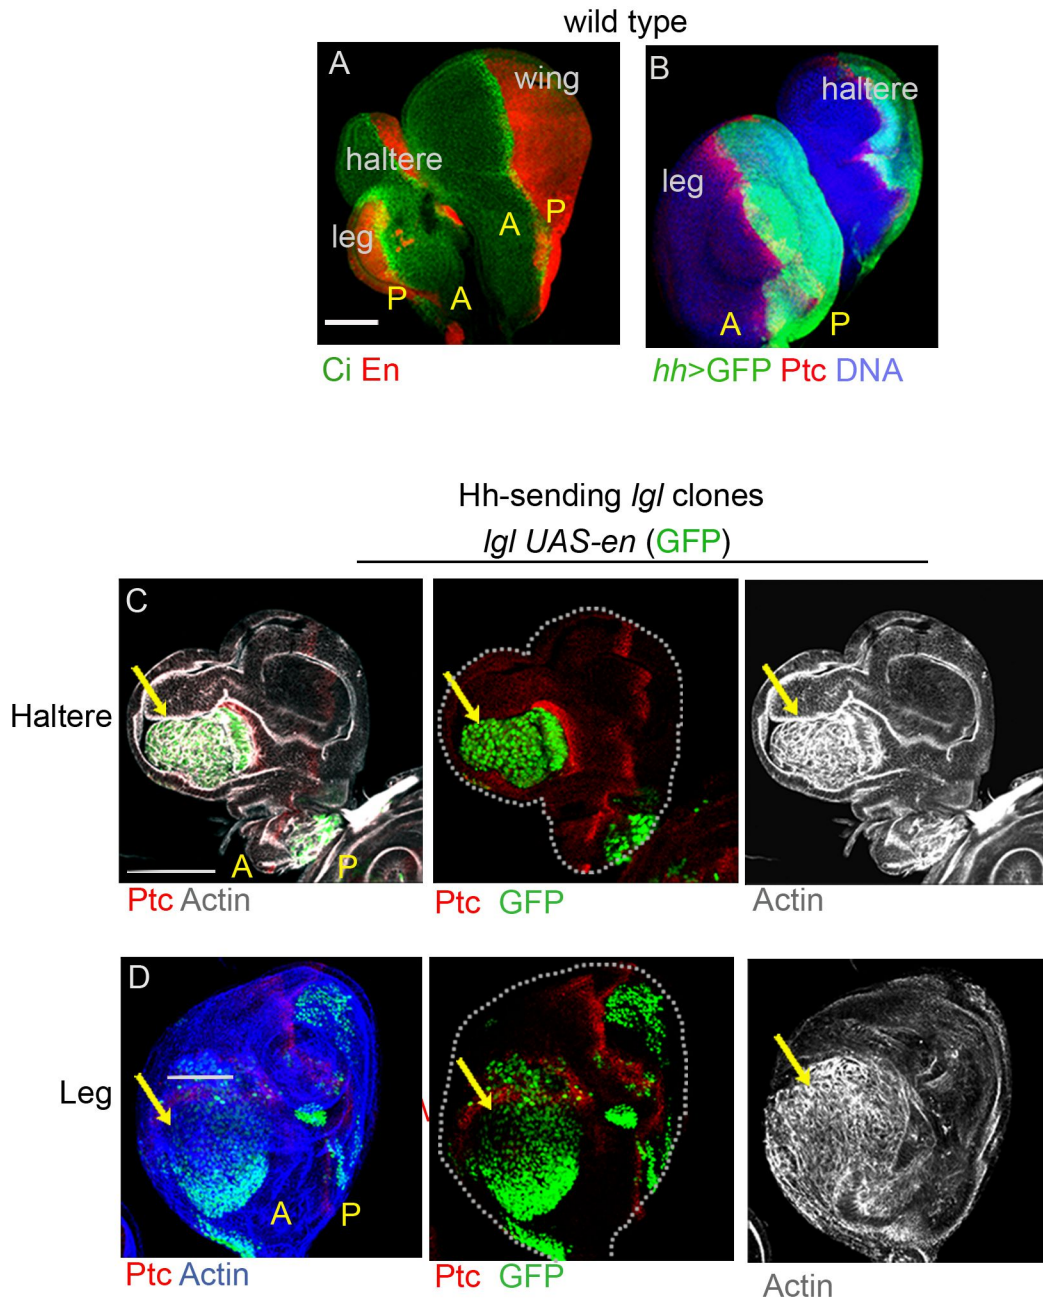

FIGURE S4

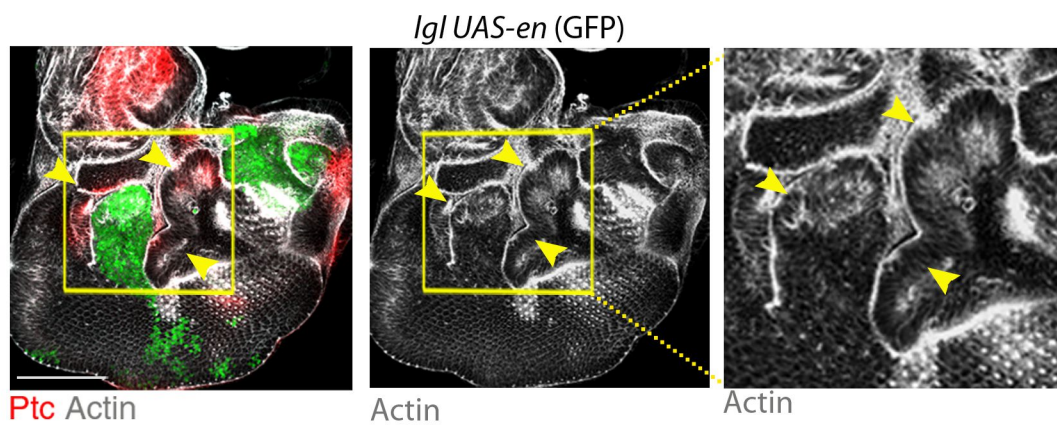

FIGURE S5

Hh-receiving *UAS-ci* clones

*UAS-ci* (GFP)

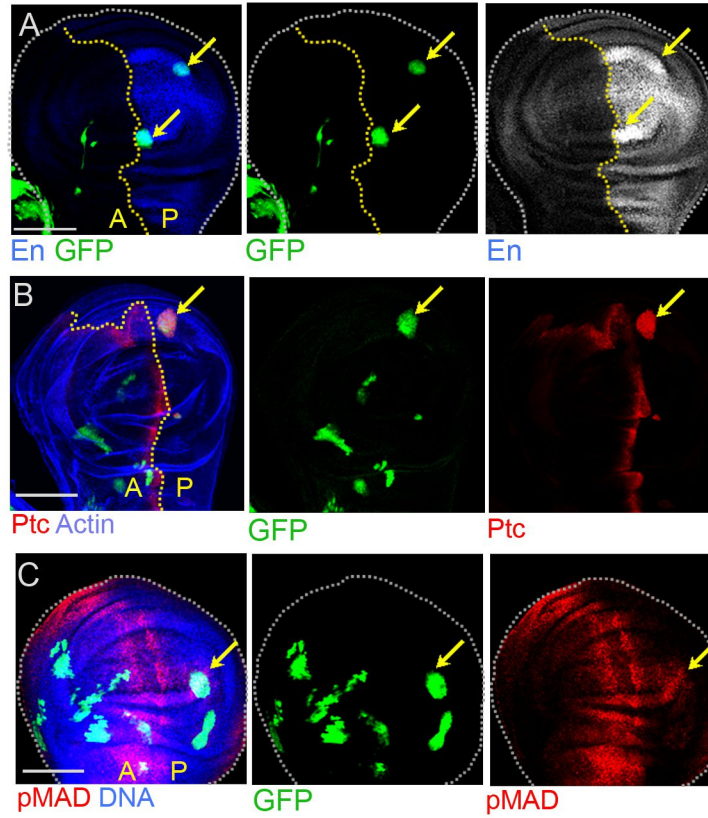

Hh-receiving *lgl* clones

*lgl UAS-ci* (GFP)

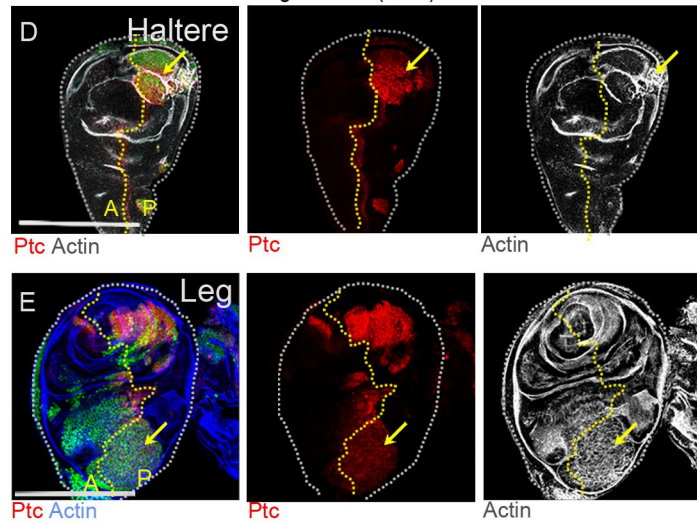

51 **Table1: RESOURCE TABLE**

52

---

| 53 | REAGENTS/ RESOURCE                                                     | SOURCE                              | IDENTIFIER |
|----|------------------------------------------------------------------------|-------------------------------------|------------|
| 54 | -----                                                                  |                                     |            |
| 55 | Experimental Models: Organisms/Strains: <i>Drosophila melanogaster</i> |                                     |            |
| 56 | <i>lgl</i> <sup>4</sup>                                                | (Khan et al., 2013)                 | -          |
| 57 | <i>UAS-yki</i>                                                         | (Huang et al., 2005)                | -          |
| 58 | <i>UAS-ci</i>                                                          | (Methot and Basler, 1999)           | -          |
| 59 | <i>UAS-en</i>                                                          | (Tabata et al., 1995)               | -          |
| 60 | <i>UAS-ptc</i>                                                         | Bloomington Drosophila stock center | BDSC_5817  |
| 61 | <i>tkv</i> <sup>4</sup>                                                | Bloomington Drosophila stock center | BDSC_58786 |

62

---

| 63 | Antibodies                      |                           | working dilution |
|----|---------------------------------|---------------------------|------------------|
| 64 | Anti-Engrailed/Invected         | DSHB*                     | 4D9 1:50         |
| 65 | Anti-Ci                         | DSHB                      | 2A1 1:50         |
| 66 | Anti-Ptc (extracellular region) | DSHB                      | Apa 1 1:50       |
| 67 | Anti-Wg                         | DSHB                      | 4D4 1:250        |
| 68 | Anti-Elav                       | DSHB                      | 9F8A9 1:200      |
| 69 | Anti-pSmad                      | Cell Signaling Technology | #8828 1:200      |
| 70 | Anti-β-gal                      | Sigma-Aldrich             | SAB4200805 1:500 |
| 71 | Anti-Lgl                        | Gift from Fumio Matsuzaki | - 1:300          |
| 72 | Anti-Vg                         | Gift from Sean Carroll    | - 1:100          |



|    |                            |            |        |       |
|----|----------------------------|------------|--------|-------|
| 73 | Alexa Fluor Phalloidin-633 | Invitrogen | A22284 | 1:100 |
| 74 | TO-PRO-3                   | Invitrogen | S33025 | 1:300 |

75 DSHB\*: Developmental Studies Hybridoma Bank, University of Iowa

76 -----

|    |                  |            |  |          |
|----|------------------|------------|--|----------|
| 77 | EdU labeling Kit | Invitrogen |  | Click-iT |
|----|------------------|------------|--|----------|

78 -----

79

## 80 CONTACT FOR REAGENT AND RESOURCE SHARING

81

82 Further information and requests for resources and reagents should be directed and will be fulfilled by the  
83 Lead Contact, Pradip Sinha (pradips@iitk.ac.in)

## 84 Genotypes of clones used in this study

### 85 FIGURE 1

#### 86 *lgl* clones with gain of Yki

87 1. *y w hs-flp tub-Gal4UAS-GFP; lgl<sup>4</sup> FRT40; UAS-yki/tub-Gal80 FRT40* (Fig. 1F,G)

### 88 FIGURE 2 and FIGURE 3

#### 89 Hh ligand-sending *lgl* clones:

90 1. *y w hs-flp tub-Gal4 UAS-GFP; lgl<sup>4</sup> FRT40; UAS-en/tub-Gal80 FRT40* (Fig. 2A-J, Fig.  
91 3C-E).

#### 92 Hh ligand-sending *lgl* clones arrested for Hh signaling

93 2. *y w hs-flp tub-Gal4 UAS-GFP; lgl<sup>4</sup> FRT40; UAS-en UAS-ptc/tub-Gal80 FRT40* (Fig. 2K,  
94 L).

#### 95 Hh ligand-sending *lgl* clones arrested for Dpp signaling

96 3. *y w hs-flp tub-Gal4 UAS-GFP; lgl<sup>4</sup> tkv<sup>4</sup> FRT40; UAS-en/tub-Gal80 FRT40* (Fig. 2M).

### 97 FIGURE 3 and FIGURE 4

#### 98 Hh ligand-receiving *lgl* clones:

99 4. *y w hs-flp tub-Gal4 UAS-GFP; lgl<sup>4</sup> FRT40; UAS-ci/tub-Gal80 FRT40* (Fig. 3F,G; Fig.  
100 4A-D)

#### 101 Hh ligand-receiving *lgl* clones arrested for Hh signaling

102 5. *y w hs-flp tub-Gal4 UAS-GFP; lgl<sup>4</sup> FRT40; UAS-ci UAS-ptc/tub-Gal80 FRT40* (Fig.4F).

103 ***Hh ligand-receiving lgl clones arrested for Dpp signaling***

104 6. *y w hs-flp tub-Gal4 UAS-GFP; lgl<sup>4</sup> tkv<sup>4</sup> FRT40; UAS-ci/tub-Gal80 FRT40* (Fig. 4G).

105 **FIGURE S1**

106 **Loss-of-function clone of *lgl*** in a genetic background that alleviates tissue surveillance/cell  
107 competition.

108 *y w hs-flp; lgl<sup>4</sup> FRT40/M, arm-lacZ FRT40*. (Fig. S1B,C).

109 **FIGURE S2**

110 **Control clones**

111 1. *y w hs-flp; UAS-ci/act>y+>Gal4 UAS-GFP*

112 **FIGURE S3:**

113 1. *lgl* clones with constitute gain of Dpp signaling:

114 *y w hs-flp tub-Gal4 UAS-GFP; lgl<sup>4</sup> tkv<sup>OD</sup> FRT40*; (Fig. 3A)

115 2. *lgl* clones blocked for Dpp reception: *y w hs-flp tub-Gal4 UAS-GFP; lgl<sup>4</sup> tkv<sup>4</sup> FRT40*.

116 (Fig. 3B)

117 **FIGURE S4:**

118 **Control clones**

119 3. *y w hs-flp; UAS-en/act>y+>Gal4 UAS-GFP*

120

121

122 **Dominguez, M., Brunner, M., Hafen, E. and Basler, K.** (1996). Sending and receiving the hedgehog  
123 signal: control by the Drosophila Gli protein Cubitus interruptus. *Science* **272**, 1621-5.

124 **Huang, J., Wu, S., Barrera, J., Matthews, K. and Pan, D.** (2005). The Hippo signaling pathway  
125 coordinately regulates cell proliferation and apoptosis by inactivating Yorkie, the Drosophila Homolog of  
126 YAP. *Cell* **122**, 421-34.

127 **Khan, S. J., Bajpai, A., Alam, M. A., Gupta, R. P., Harsh, S., Pandey, R. K., Goel-Bhattacharya, S., Nigam,  
128 A., Mishra, A. and Sinha, P.** (2013). Epithelial neoplasia in Drosophila entails switch to primitive cell  
129 states. *Proc Natl Acad Sci U S A* **110**, E2163-72.

130 **Methot, N. and Basler, K.** (1999). Hedgehog controls limb development by regulating the activities of  
131 distinct transcriptional activator and repressor forms of Cubitus interruptus. *Cell* **96**, 819-31.

132 **Subramanian, A., Tamayo, P., Mootha, V. K., Mukherjee, S., Ebert, B. L., Gillette, M. A., Paulovich, A.,  
133 Pomeroy, S. L., Golub, T. R., Lander, E. S. et al.** (2005). Gene set enrichment analysis: a knowledge-  
134 based approach for interpreting genome-wide expression profiles. *Proc Natl Acad Sci U S A* **102**, 15545-  
135 50.

136 **Tabata, T., Schwartz, C., Gustavson, E., Ali, Z. and Kornberg, T. B.** (1995). Creating a Drosophila wing de  
137 novo, the role of engrailed, and the compartment border hypothesis. *Development* **121**, 3359-69.

138 **Tanimoto, H., Itoh, S., ten Dijke, P. and Tabata, T.** (2000). Hedgehog creates a gradient of DPP activity in  
139 Drosophila wing imaginal discs. *Mol Cell* **5**, 59-71.

140 **van den Heuvel, M., Harryman-Samos, C., Klingensmith, J., Perrimon, N. and Nusse, R.** (1993).

141 Mutations in the segment polarity genes wingless and porcupine impair secretion of the wingless  
142 protein. *EMBO J* **12**, 5293-302.

143 **Zecca, M., Basler, K. and Struhl, G.** (1995). Sequential organizing activities of engrailed, hedgehog and  
144 decapentaplegic in the *Drosophila* wing. *Development* **121**, 2265-78.  
145
